# Supplementary material
Source: PubMed Central journal article supplement (PMC3150899)

# Supporting Information

Campbell et al. 10.1073/pnas.1101405108

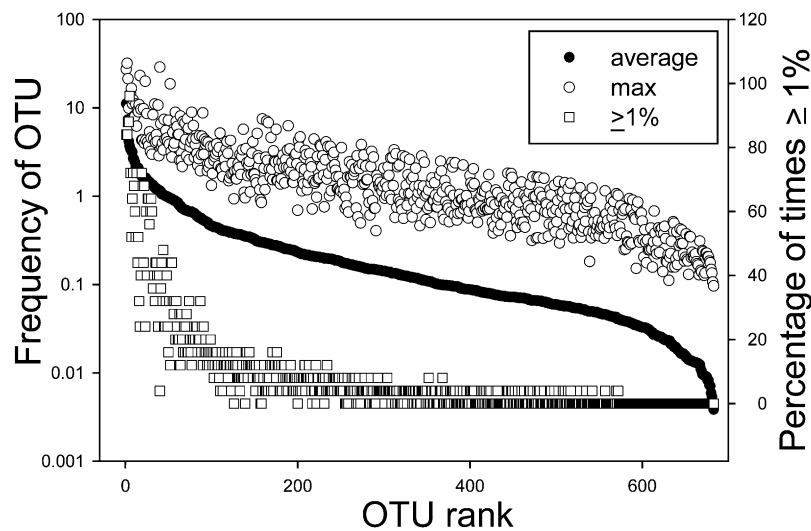

Fig. S1. Rank abundance curve of bacterial OTUs defined by 16S rDNA pyrosequencing of 25 Delaware coastal site surface water samples taken monthly over 3 y. Average (●) and maximum frequencies (○) of each OTU are plotted. The percentage of times the OTU frequency was equal to or above 1% (□).

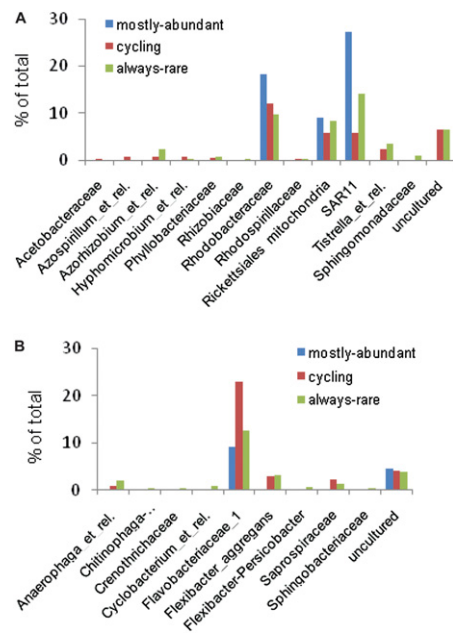

Fig. S2. Phylogenetic classification of bacterial OTUs found in Delaware coastal surface waters. Members of the (A) *Alphaproteobacteria* and (B) *Bacteroidetes*. The groups' percentage was divided into three categories: mostly abundant (occurring >50% of the time), cycling (<50% of the time), and always rare.



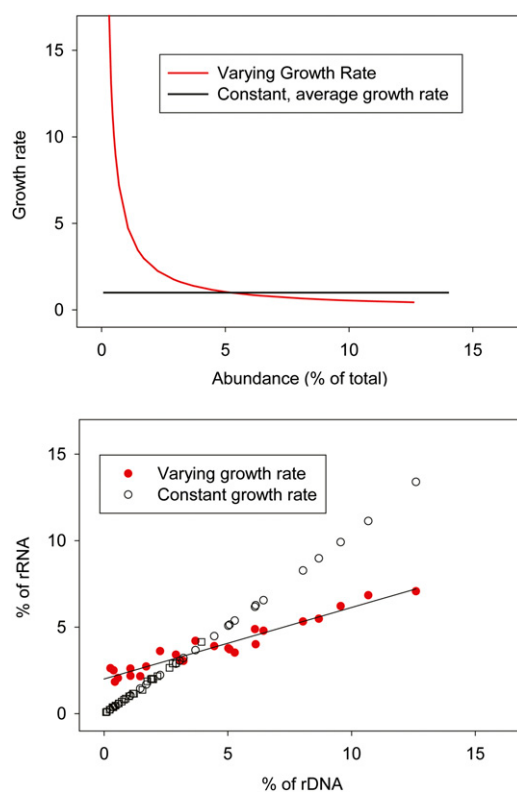

Supplement: 1101405108_pnas.201101405SI.pdf [file 1101405108_pnas.201101405SI.pdf]
